# Supplementary material
Source: PubMed Central journal article supplement (PMC5374057)
Supplement: NIHMS831548-supplement.pdf [file NIHMS831548-supplement.pdf]

## Alterations in a Unique Class of Cortical Chandelier Cell Axon Cartridges in Schizophrenia

### *Supplemental Information*

**Table S1.** Detailed demographic and postmortem characteristics of human subjects. There were no statistical differences between schizophrenia and comparison subjects in age ( $45.05 \pm 7.27$  yrs and  $45.75 \pm 8.69$  yrs, respectively), PMI ( $9.53 \pm 3.39$  hrs and  $9.92 \pm 4.04$  hrs, respectively), and storage time ( $11.69 \pm 5.29$  yrs and  $13.78 \pm 5.28$  yrs, respectively). Previously studied designates histology or protein expression studies that included the pair (1-6). Numbers designate the associated reference(s).

| Healthy Comparison Subjects |      |              |              |                  |                              |                             | Subjects with Schizophrenia |                                        |              |              |                  |                              |                                     |                            |                             |                                                     |                         |                       |
|-----------------------------|------|--------------|--------------|------------------|------------------------------|-----------------------------|-----------------------------|----------------------------------------|--------------|--------------|------------------|------------------------------|-------------------------------------|----------------------------|-----------------------------|-----------------------------------------------------|-------------------------|-----------------------|
| Pair                        | Case | Sex/<br>Race | Age<br>(yrs) | PMI <sup>a</sup> | Storage<br>Time <sup>b</sup> | Cause of<br>Death           | Case                        | DSM IV<br>diagnosis                    | Sex/<br>Race | Age<br>(yrs) | PMI <sup>a</sup> | Storage<br>Time <sup>b</sup> | Cause of<br>Death                   | Antipsy-<br>chotic<br>ATOD | Antide-<br>pressant<br>ATOD | Benzodiazep-<br>ine/<br>Anticon-<br>vulsant<br>ATOD | Nicotine<br>Use<br>ATOD | Previously<br>studied |
| 1                           | 727  | M/B          | 19           | 7.00             | 12.90                        | Trauma                      | 829                         | Schizoaffective disorder; ADC; OAR     | M/W          | 25           | 5.00             | 11.34                        | Suicide by salicylate overdose      | N                          | N                           | Y                                                   | Y                       | 1,2,3,6,7             |
| 2                           | 852  | M/W          | 54           | 8.00             | 10.90                        | Cardiac tamponade           | 781                         | Schizoaffective disorder; ADR          | M/B          | 52           | 8.00             | 12.16                        | Peritonitis                         | Y                          | Y                           | N                                                   | Y                       | 1,2,3,7               |
| 3                           | 1307 | M/B          | 32           | 4.80             | 5.20                         | ASCVD                       | 10024                       | Paranoid schizophrenia                 | M/B          | 37           | 5.98             | 5.96                         | ASCVD                               | N                          | N                           | N                                                   | N                       | 1,7                   |
| 4                           | 567  | F/W          | 46           | 15.00            | 14.80                        | Mitral valve prolapse       | 537                         | Schizoaffective disorder               | F/W          | 37           | 14.50            | 15.25                        | Suicide by hanging                  | N                          | N                           | N                                                   | U                       | 1,2,6,7               |
| 5                           | 1047 | M/W          | 43           | 13.80            | 8.10                         | ASCVD                       | 1209                        | Schizoaffective disorder               | M/W          | 35           | 9.1              | 6.50                         | Suicide by diphenhydramine overdose | Y                          | N                           | N                                                   | N                       | 1,7                   |
| 6                           | 739  | M/W          | 40           | 15.8             | 13                           | ASCVD                       | 933                         | Disorganized schizophrenia             | M/W          | 44           | 8.30             | 9.66                         | Myocarditis                         | Y                          | Y                           | Y                                                   | N                       | 1,3,7                 |
| 7                           | 451  | M/W          | 48           | 12.00            | 16.30                        | ASCVD                       | 317                         | Chronic undifferentiated schizophrenia | M/W          | 48           | 8.30             | 18.9                         | Bronchopneumonia                    | Y                          | Y                           | N                                                   | N                       | 5,7                   |
| 8                           | 178  | M/W          | 48           | 7.80             | 20.50                        | ASCVD                       | 377                         | Chronic undifferentiated schizophrenia | M/W          | 52           | 10.00            | 18.1                         | Gastrointestinal bleeding           | Y                          | N                           | N                                                   | N                       | 4,5,7                 |
| 9                           | 452  | F/W          | 40           | 14.30            | 16.30                        | ASCVD                       | 341                         | Chronic undifferentiated schizophrenia | F/W          | 47           | 14.50            | 18.6                         | Suicide, chlorpromazine overdose    | Y                          | N                           | N                                                   | Y                       | 6,7                   |
| 10                          | 449  | F/W          | 47           | 4.30             | 16.30                        | Accidental CO poisoning     | 517                         | Chronic disorganized schizophrenia     | F/W          | 48           | 3.70             | 15.10                        | Intracerebral hemorrhage            | Y                          | N                           | N                                                   | Y                       | 4,5,7                 |
| 11                          | 681  | M/W          | 51           | 11.60            | 14.10                        | Hypertrophic cardiomyopathy | 234                         | Chronic paranoid schizophrenia         | M/W          | 51           | 12.80            | 21.00                        | Cardiomyopathy                      | N                          | N                           | N                                                   | N                       | 4,5,6,7               |
| 12                          | 395  | M/W          | 42           | 12.30            | 18.80                        | Pericardial tamponade       | 322                         | Chronic undifferentiated schizophrenia | M/W          | 40           | 8.50             | 20.20                        | Suicide, combined drug overdose     | Y                          | Y                           | N                                                   | N                       | 7                     |
| 13                          | 575  | F/B          | 55           | 11.30            | 15.40                        | ASCVD                       | 597                         | Schizoaffective disorder               | F/W          | 46           | 10.10            | 15.1                         | Pneumonia                           | Y                          | Y                           | N                                                   | Y                       | 6,7                   |
| 14                          | 278  | M/W          | 50           | 4.50             | 20.40                        | ASCVD                       | 640                         | Chronic paranoid schizophrenia         | M/W          | 49           | 5.20             | 14.5                         | Pulmonary Embolism                  | Y                          | Y                           | N                                                   | U                       | 7                     |
| 15                          | 1284 | M/W          | 55           | 6.40             | 5.60                         | ASCVD                       | 1105                        | Schizoaffective disorder               | M/W          | 53           | 7.90             | 7.47                         | ASCVD                               | Y                          | N                           | N                                                   | Y                       | 7                     |
| 16                          | 1122 | M/W          | 55           | 15.40            | 7.30                         | Cardiac Tamponade           | 930                         | Disorganized schizophrenia; ADR; OAR   | M/W          | 47           | 15.30            | 9.70                         | ASCVD                               | Y                          | N                           | Y                                                   | Y                       | 7                     |
| 17                          | 250  | F/W          | 47           | 5.30             | 19.70                        | ASCVD                       | 398                         | Schizoaffective disorder               | F/W          | 41           | 10.30            | 17.7                         | Pulmonary embolus                   | Y                          | N                           | Y                                                   | U                       | 4,5,6,7               |
| 18                          | 412  | M/W          | 42           | 14.20            | 17.50                        | Aortic stenosis             | 422                         | Chronic paranoid schizophrenia         | M/W          | 54           | 11.00            | 17.20                        | ASCVD                               | Y                          | N                           | Y                                                   | U                       | 4,5,7                 |
| 19                          | 344  | M/W          | 50           | 6.80             | 18.60                        | ASCVD                       | 1296                        | Undifferentiated schizophrenia         | M/W          | 48           | 7.80             | 5.42                         | Pneumonia                           | Y                          | Y                           | N                                                   | Y                       | 7                     |
| 20                          | 1391 | F/W          | 51           | 7.8              | 4                            | ASCVD                       | 1189                        | Schizoaffective disorder; AAR          | F/W          | 47           | 14.4             | 7                            | Suicide by combined drug overdose   | Y                          | Y                           | Y                                                   | Y                       | 1,7                   |

<sup>a</sup>PMI, postmortem interval (hours).

<sup>b</sup>Years stored in 30% glycerin/30% ethylene glycol solution at -30°C.

ASCVD, arteriosclerotic cardiovascular disease; ATOD, at time of death; U, unknown; M, male; F, female; W, white; B, black.

**Table S1 References**

1. Glausier JR, Kimoto S, Fish KN, Lewis DA (2015): Lower glutamic acid decarboxylase 65-kDa isoform messenger RNA and protein levels in the prefrontal cortex in schizoaffective disorder but not schizophrenia. *Biol Psychiatry*. 77:167-176.
2. Glausier JR, Fish KN, Lewis DA (2014): Altered parvalbumin basket cell inputs in the dorsolateral prefrontal cortex of schizophrenia subjects. *Mol Psychiatry*. 19:30-36.
3. Curley AA, Arion D, Volk DW, Asafu-Adjei JK, Sampson AR, Fish KN, et al. (2011): Cortical deficits of glutamic acid decarboxylase 67 expression in schizophrenia: clinical, protein, and cell type-specific features. *Am J Psychiatry*. 168:921-929.
4. Volk DW, Pierri JN, Fritschy JM, Auh S, Sampson AR, Lewis DA (2002): Reciprocal alterations in pre- and postsynaptic inhibitory markers at chandelier cell inputs to pyramidal neurons in schizophrenia. *Cerebral Cortex*. 12:1063-1070.
5. Pierri JN, Chaudry AS, Woo TU, Lewis DA (1999): Alterations in chandelier neuron axon terminals in the prefrontal cortex of schizophrenic subjects. *Am J Psychiatry*. 156:1709-1719.
6. Eggen SM, Stoyak SR, Verrico CD, Lewis DA (2010): Cannabinoid CB1 receptor immunoreactivity in the prefrontal cortex: Comparison of schizophrenia and major depressive disorder. *Neuropsychopharmacology*.
7. Rocco BR, Lewis DA, Fish KN (2015): Markedly lower glutamic acid decarboxylase 67 protein levels in a subset of boutons in schizophrenia. *Biol Psychiatry*.

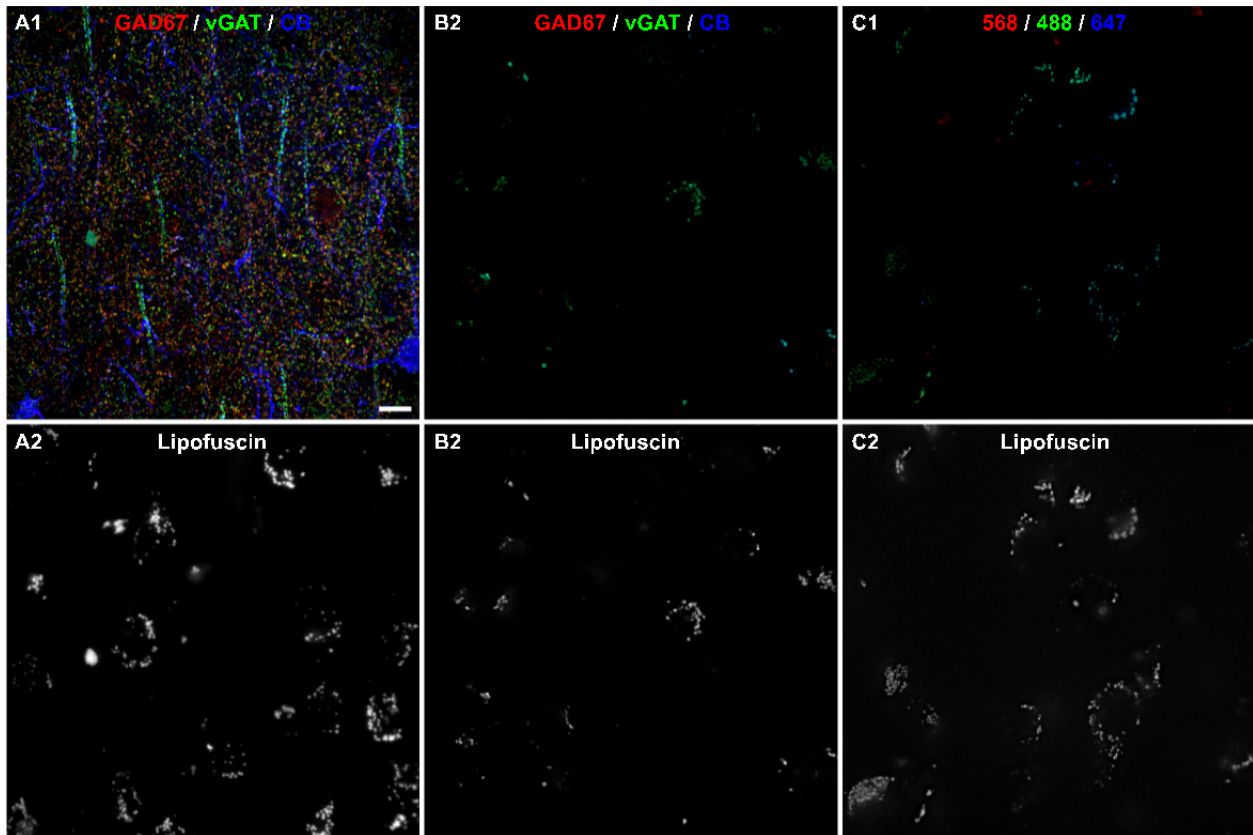

**Figure S1.** Specificity of GAD67, vGAT, and CB antibodies in human PFC. (A1-C1) Maximum intensity z-plane projection images of human PFC tissue sections (subject 10024). The sections were immunolabeled with (A) GAD67, vGAT, and CB antibodies; (B) GAD67, vGAT, and CB antibodies preabsorbed to their respective antigens; or (C) only Alexa 568, Alexa 488, and Alexa 647 secondary antibodies. (A2-C2) Single channel images showing the lipofuscin autofluorescence in A1-C1. Bar = 10  $\mu$ m.

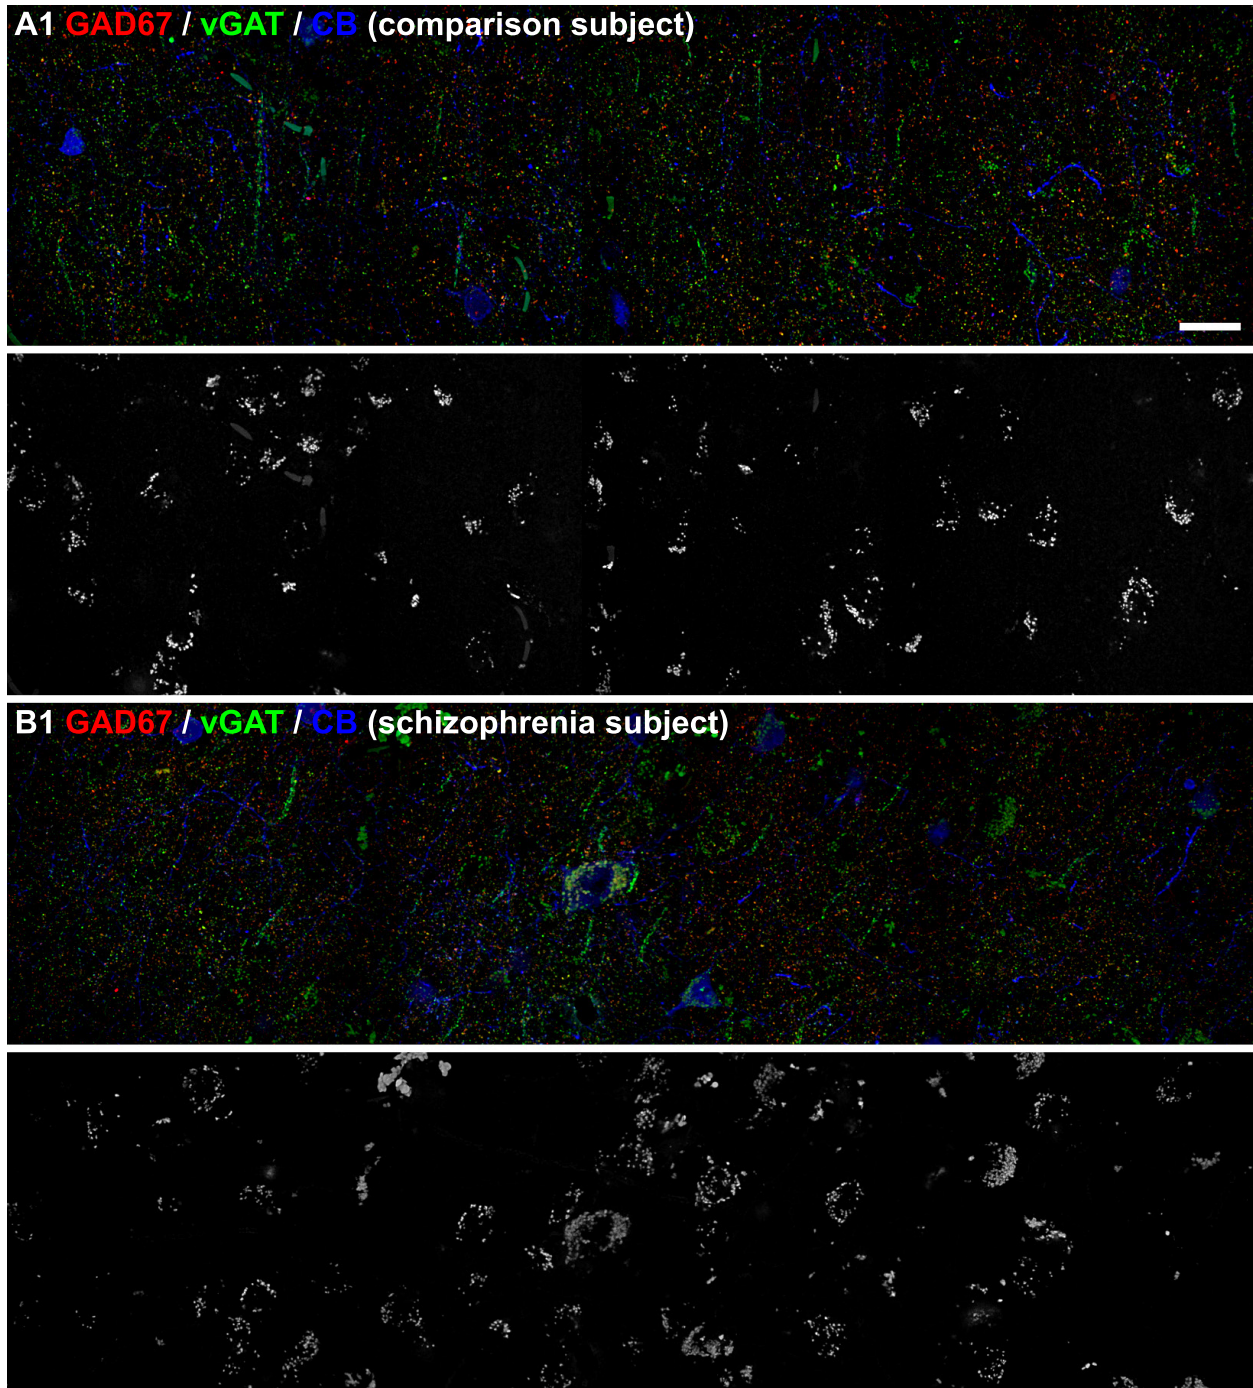

**Figure S2.** High magnification, maximum intensity z-plane projection montage images. (A1) Human PFC tissue section (comparison subject 452, pair 9) immunolabeled for GAD67, vGAT, and CB. (A2) Corresponding lipofuscin autofluorescence channel for montage in A1. (B1) Human PFC tissue section (schizophrenia subject 341, pair 9) immunolabeled for GAD67, vGAT, and CB. (B2) Corresponding lipofuscin autofluorescence channel for montage in B1. Bar = 20  $\mu$ m.

## Supplemental Methods

### ***Microscopy***

TetraSpeck microspheres (fluorescent blue/green/orange/dark red; Invitrogen) were used to confirm the absence of alignment issues between wavelengths.

### ***Lipofuscin Autofluorescence***

A potential confound of quantitative fluorescence measures in human cortex is lipofuscin autofluorescence, which is detectable across a broad range of wavelengths. To exclude this potential confound, lipofuscin was imaged using a fourth channel at a constant exposure time across all sections. Lipofuscin autofluorescence was masked using a single optimal threshold value for each image stack, and vGAT, GAD67, and CB object masks that overlapped a lipofuscin mask were eliminated from analyses. Importantly, lipofuscin fluorescence intensity did not differ between schizophrenia ( $335 \pm 89$  a.u.) and unaffected comparison ( $342 \pm 79$  a.u.) subjects (paired  $F_{1, 19} = 0.246$ ,  $p = 0.626$ ; unpaired  $F_{1, 37} = 0.175$ ,  $p = 0.678$ ).
